23

## 24 **ABSTRACT**

25 The DNA mismatch repair (MMR) pathway corrects mismatched bases produced during DNA  
26 replication and is highly conserved across the tree of life, reflecting its fundamental importance  
27 for genome integrity. Loss of function in one or a few MMR genes can lead to increased  
28 mutation rates and microsatellite instability, as seen in some human cancers. While loss of MMR  
29 genes has been documented in the context of human disease and in hypermutant strains of  
30 pathogens, examples of entire species and species lineages that have experienced substantial  
31 MMR gene loss are lacking. We examined the genomes of 1,107 species in the fungal phylum  
32 Ascomycota for the presence of 52 genes known to be involved in the MMR pathway of fungi.  
33 We found that the median ascomycete genome contained 49 / 52 MMR genes. In contrast, four  
34 closely related species of obligate plant parasites from the powdery mildew genera *Erysiphe* and  
35 *Blumeria*, have lost between 6 and 22 MMR genes, including *MLH3*, *EXO1*, and *DPB11*. The  
36 lost genes span MMR functions, include genes that are conserved in all other ascomycetes, and  
37 loss of function of any of these genes alone has been previously linked to increased mutation  
38 rate. Consistent with the hypothesis that loss of these genes impairs MMR pathway function, we  
39 found that powdery mildew genomes with high levels of MMR gene loss exhibit increased  
40 numbers of monomer repeats, longer microsatellites, accelerated sequence evolution, elevated  
41 mutational bias in the A|T direction, and decreased GC content. These results identify a striking  
42 example of macroevolutionary loss of multiple MMR pathway genes in a eukaryotic lineage,  
43 even though the mutational outcomes of these losses appear to resemble those associated with  
44 detrimental MMR dysfunction in other organisms.

## 45 **Introduction**

46 An ensemble of DNA repair pathways and cell cycle checkpoints are responsible for detecting  
47 and repairing DNA damage, ensuring faithful maintenance of the genome (Friedberg et al. 2005;  
48 Giglia-Mari et al. 2010). Among DNA repair pathways, the DNA mismatch repair (MMR)  
49 pathway is arguably one of the best characterized (Marti et al. 2002). The MMR pathway is  
50 responsible for repairing bases that were incorrectly paired during DNA replication via five  
51 steps: recognition, incision, removal, re-synthesis, and ligation (Fig. 1) (Hsieh & Zhang 2017;  
52 Fukui 2010; Marti et al. 2002). The MMR pathway is highly conserved in both bacteria and  
53 eukaryotes; cells that experience reduction or loss of function in this pathway have increased  
54 levels of mutation, as seen in cancer and drug-resistant fungal pathogen strains (Fukui 2010;  
55 Campbell et al. 2017; Billmyre et al. 2017, 2020; Dos Reis et al. 2019).

56  
57 Although DNA repair genes are generally highly conserved, certain fungal lineages have been  
58 reported to have a more limited repertoire of DNA repair genes, particularly within the phylum  
59 Ascomycota. For example, budding yeasts (subphylum Saccharomycotina) and fission yeasts  
60 (Taphrinomycotina) have fewer DNA repair genes than filamentous fungi (Pezizomycotina)  
61 (Milo et al. 2019; Shen et al. 2020). Furthermore, DNA repair genes that were lost from budding  
62 yeasts and fission yeasts are more likely to also be lost in filamentous fungi (Milo et al. 2019).  
63 One lineage that has endured extensive losses in its repertoire of DNA repair genes is the  
64 *Hanseniaspora* genus of budding yeasts (Steenwyk et al. 2019). *Hanseniaspora* species have  
65 undergone punctuated sequence evolution and have accumulated large numbers of diverse types  
66 of substitutions, including those associated with specific gene losses such as UV damage,  
67 suggesting that DNA repair is impaired by the high levels of DNA repair gene loss. These

68 findings suggest that DNA repair genes are not universally conserved across fungi and that their  
69 loss is compatible with long-term evolutionary survival and diversification of fungal lineages.

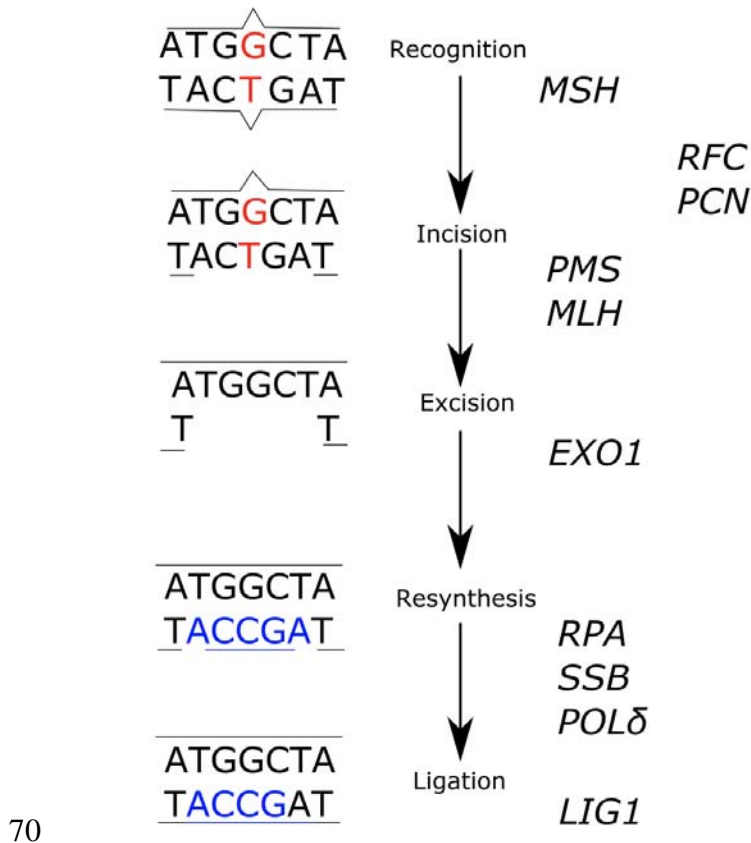

71 **Fig. 1. The DNA Mismatch Repair (MMR) pathway corrects mismatched bases produced**  
72 **during DNA replication and prevents instability in microsatellites.** The pathway is comprised  
73 of five conserved steps: recognition of mispaired bases, incision of the DNA strand, excision of  
74 the incorrectly paired bases, resynthesis of the DNA strand, and ligation of the newly synthesized  
75 segment to the DNA strand. *RFC* and *PCNA* genes are involved with multiple steps in the  
76 pathway. We categorized *RFC* genes as being primarily responsible for resynthesis, though they  
77 are also involved in loading proliferating cell nuclear antigen (Surtees & Alani 2004). We  
78 categorize proliferating cell nuclear antigen (*PCN1*, *POL30*) as a recognition gene, though it has  
79 been implicated in early and late steps in the MMR pathway (Lau et al. 2002; Schofield & Hsieh  
80 2003; Umar et al. 1996; Surtees & Alani 2004). In addition, *RFC* and *PCNA* can interact with  
81 *EXO1* to modulate excision directionality (Surtees & Alani 2004).

82

83 One well-established consequence of MMR dysfunction is mutation in microsatellite regions of  
84 the genome. Microsatellites are repetitive tracts of DNA, with motifs 1-6 bp long repeated at  
85 least five times (Beier et al. 2017). Microsatellites are typically highly polymorphic between

86 individuals and are commonly used as markers in population biology, forensics, paternity testing,  
87 and tumor characterization (Richman 2015). Due to their repetitive nature, microsatellites are  
88 prone to experiencing polymerase slippage, which is usually corrected by the MMR pathway  
89 (Ellegren 2004; Richman 2015). If the MMR pathway does not recognize these errors, as is the  
90 case in cancer, microsatellite instability (MSI) can occur (Campbell et al. 2017). MSI is defined  
91 by a hypermutable phenotype resulting from a loss of function in the MMR pathway (Boland &  
92 Goel 2010). Instability in microsatellites trends towards elongation in these regions, but  
93 contraction can also occur (Ellegren 2004).

94

95 Beyond increased mutation in microsatellite regions, aberrant function of the MMR pathway is  
96 associated with genome-wide signatures of genetic instabilities (Boland & Goel 2010; Billmyre  
97 et al. 2017, 2020). MMR mutations have been implicated in the development of hypermutant and  
98 ultrahypermutant human cancers, which constitute approximately 15% of human tumors and less  
99 than 1% of tumors, respectively (Campbell et al. 2017). Interestingly, very few tumors with low  
100 mutation rates contained mutations in the MMR pathway, whereas more than a third of  
101 hypermutant tumors and virtually all the ultrahypermutants contained mutations in MMR genes  
102 (Campbell et al. 2017). Hypermutant tumors had high levels of MSI suggesting their  
103 hypermutant phenotype is due, at least in part, to MMR dysfunction (Campbell et al. 2017).

104 Hypermutation has also been observed in fungal pathogen strains that have lost MMR pathway  
105 genes, potentially driving within-host adaptation and the evolution of drug resistance. For  
106 example, Rhodes *et al.* (2017) found that hypermutation caused by mutations in three MMR  
107 pathway genes, including *MSH2*, resulted in a rapid increase in the mutation rate of the human  
108 pathogenic fungus *Cryptococcus neoformans*, contributing to infection relapse. Similarly,

109 Billmyre *et al.* (2017) sequenced multiple strains of the human pathogenic fungus *Cryptococcus*  
110 *deuterogattii* (phylum Basidiomycota) and found that a group of strains with mutations in the  
111 *MSH2* gene experienced higher rates of mutation when compared with closely related strains  
112 harboring an intact *MSH2* gene. Hypermutation in *C. deuterogattii* mediated rapid evolution of  
113 antifungal drug resistance (Billmyre *et al.* 2017, 2020).

114  
115 In contrast to MMR gene loss in the microevolutionary context of genetic or infectious disease,  
116 the extent of MMR gene loss across lineages spanning multiple species remains understudied. To  
117 determine the macroevolutionary impact of MMR gene conservation and loss, we characterized  
118 patterns of MMR gene presence and absence in the fungal phylum Ascomycota (Fig. 2). We  
119 found that the MMR pathway was highly conserved across Ascomycota, with the median species  
120 having 49 / 52 MMR genes present. However, we found that *Blumeria graminis* and species in  
121 the powdery mildew genus *Erysiphe* (subphylum Pezizomycotina, class Leotimycetes), a group  
122 of obligate plant parasites, had many fewer MMR genes and a faster rate of sequence evolution  
123 than their relatives and most other fungal taxa. Specifically, *Erysiphe necator* has lost 10 MMR  
124 genes, *Erysiphe pisi* has lost 22 MMR genes, *Erysiphe pulchra* has lost 9 MMR genes, and  
125 *Blumeria graminis* has lost 6 MMR genes (Fig. 3). In contrast, species closely related to  
126 *Erysiphe* and *Blumeria* have lost only 1 – 3 MMR genes, consistent with the high degree of  
127 MMR gene conservation in the rest of the phylum. Evolutionary genomic analyses revealed that  
128 MMR gene losses in *Erysiphe* and *Blumeria* (hereafter referred to as high loss taxa or HLT) are  
129 associated with a proliferation of monomeric runs and elongation of microsatellites of all motif  
130 lengths, both of which are hallmarks of MMR pathway dysfunction. Reflecting these losses,  
131 *Erysiphe* and *Blumeria* genomes also have more pronounced mutational biases and accelerated

132 rates of mutation. These results suggest that obligate plant parasites in the genera *Blumeria* and  
133 *Erysiphe* have diversified while lacking otherwise highly conserved MMR genes.

134

## 135 **METHODS**

### 136 **Curation of the set of DNA mismatch repair pathway genes**

137 To investigate the presence and absence of MMR genes across the fungal phylum Ascomycota,  
138 we curated a dataset of MMR genes from the genomes of three fungal model organisms  
139 representing the three different subphyla: *Saccharomyces cerevisiae* (subphylum  
140 Saccharomycotina), *Neurospora crassa* (Pezizomycotina), and *Schizosaccharomyces pombe*  
141 (Taphrinomycotina). We used three sources to curate genes that are part of the MMR pathway:  
142 the Kyoto Encyclopedia of Genes and Genomes ([KEGG, genome.jp/kegg/](http://KEGG.genome.jp/kegg/); Kanehisa & Goto,  
143 [2000](#)), the *Schizosaccharomyces pombe* database (PomBase, [pombase.org/](http://pombase.org/); Lock et al., 2019;  
144 The Gene Ontology Consortium, 2019), and the *Saccharomyces* Genome Database (SGD,  
145 [yeastgenome.org/](http://yeastgenome.org/); Cherry et al., 2012). All genes in the KEGG diagram of the MMR pathway  
146 for each species were included and the gene ontology (GO) term “mismatch repair” was used to  
147 search for the genes on SGD and Pombase (Ashburner et al. 2000). We used both  
148 computationally and manually curated genes from SGD. We began curating our set of MMR  
149 genes in *S. cerevisiae*, with a total of 30 MMR genes identified with KEGG and SGD. Next, we  
150 searched KEGG and Pombase for genes in *S. pombe* that had not been annotated as part of the  
151 MMR pathway in *S. cerevisiae* (n = 15). We concluded by searching for *N. crassa* MMR genes  
152 in KEGG which had not already been categorized as MMR genes in the other two species (n =7).  
153 KEGG listed two sequences for the *N. crassa* gene *LIG1*; however, since our sequence similarity

154 search analyses with both sequences yielded identical patterns of loss, we present them as one  
 155 gene. This approach yielded a total of 52 genes associated with MMR (Table 1).

156

157 **Table 1. List and function of MMR genes used in this study.**

|              | <i>S. cerevisiae</i>                                                       | <i>S. pombe</i>                                  | <i>N. crassa</i>                        |
|--------------|----------------------------------------------------------------------------|--------------------------------------------------|-----------------------------------------|
| Recognition  | <i>HSM3, MSH1, MSH2, MSH3, MSH4, MSH5, MSH6, NHP6A, POL30, RAD34, RAD4</i> | <i>PCN1, RHP41, RHP42</i>                        | ---*                                    |
| Incision     | <i>MLH1, MLH2, MLH3, PMS1, RNH201</i>                                      | <i>HNT3, MYH1,</i>                               | <i>PMS2</i>                             |
| Removal      | <i>DIN7, EXO1</i>                                                          | <i>UVE1</i>                                      | ---*                                    |
| Re-synthesis | <i>DPB11, POL31, POL32, POL3, RFA1, RFA2, RFC1, RFC2, RFC3, RFC4, RFC5</i> | <i>CDC1, CDC27, CDC6, CDM1, SSB1, SSB2, SSB3</i> | <i>POLD1, POLD2, POLD3, POLD4, RPA3</i> |
| Ligation     | <i>CDC9</i>                                                                | <i>ADL1, CDC17</i>                               | <i>LIG1</i>                             |

158 Genes sourced from Chang et al., 2001; Chauleau et al., 2015; Fukui, 2010; KEGG; Kaur et al., 1999; Marti et al.,  
 159 2003; Reyes et al., 2015

160 \*no *N. crassa* genes were selected for that function.

161

162

163 **MMR gene conservation analysis**

164 To examine the conservation of MMR genes across Ascomycota, we implemented a sensitive  
 165 probabilistic modeling approach using profile Hidden Markov Models (pHMMs) (Johnson et al.  
 166 2010) of MMR genes across the genomes of 1,107 species (Shen et al. 2020). To construct  
 167 pHMMs, we first searched for putative homologs of MMR genes in the fungal RefSeq protein  
 168 database using the blastp function of BLAST+, v2.8.1, with a bitscore threshold of 50 and an e-  
 169 value cutoff of  $1 \times 10^{-3}$  (Pearson 2013). We retrieved the top 100 hits using SAMTOOLS, v1.6 (Li  
 170 et al. 2009) with the ‘faidx’ function. We used MAFFT, v7.402 (Katoh et al. 2002), with the  
 171 ‘genafpair’ and ‘reordered’ parameters, a maximum of 1000 cycles of iterative refinement, the  
 172 BLOSUM62 matrix, a gap opening penalty of 1.0, and the retree parameter set to 1, to align the  
 173 sequences following previously established protocol (Steenwyk, Shen, et al. 2019). We then used  
 174 the aligned amino acid sequences as input to the ‘hmmbuild’ function in HMMER-3.1B2 to



175 construct each pHMM. We ran the pHMMs of the 52 proteins against all 1,107 proteomes using  
176 the ‘hmmsearch’ function. For a gene to be considered present, we set a bitscore threshold of at  
177 least 50 and an e-value threshold of less than  $1 \times 10^{-6}$ . We used the tblastn function of BLAST+,  
178 v2.8.1 with a bitscore threshold of 50, e-value cutoff of  $1 \times 10^{-6}$ , and 50% minimum query  
179 coverage to verify MMR gene absence using the protein sequence of the gene in question and the  
180 1,107 Ascomycota genomes. We used the Interactive Tree of Life (iTOL), v4 (Letunic & Bork  
181 2019) to visualize the conservation of MMR genes on the Ascomycota phylogeny and to map  
182 losses on it.

183

#### 184 **Microsatellite identification and characterization**

185 To identify microsatellites and evaluate their numbers and lengths between genomes with  
186 substantial MMR gene loss against those with higher levels of MMR gene conservation, we used  
187 the Microsatellite Identification tool (MISA), v2.0 (Beier et al. 2017). Specifically, we compared  
188 the microsatellites of two groups of taxa, each of which contained four species. The group of  
189 high loss taxa (HLT) contains the powdery mildews *Blumeria graminis*, *Erysiphe necator*,  
190 *Erysiphe pisi*, and *Erysiphe pulchra*, which show high levels of MMR gene loss relative to other  
191 ascomycetes. The group of low loss taxa (LLT) contains four closely related species with low  
192 levels of MMR gene loss, similar to patterns seen across the rest of the phylum: *Articulospora*  
193 *tetracladia*, *Ascocoryne sarcooides*, *Cairneyella variabilis*, and *Phialocephala scopiformis*. The  
194 length minimums used for MISA to identify a microsatellite are as follows: 1 base pair (bp)  
195 motifs must repeat 12 times, 2 bp motifs must repeat 6 times, 3-6 bp motifs must repeat 5 times.  
196 All values used are MISA defaults, except the monomeric parameter, which was increased from  
197 the default value of 10 repeats to 12 (Beier et al. 2017; Temnykh et al. 2001). A 2-way ANOVA  
198 test was performed to test for significance in the number of microsatellites controlled by genome

199 size of each motif length between HLT and LLT. If the 2-way ANOVA rejected the null  
200 hypothesis ( $\alpha = 0.05$ ), pairwise comparisons were made with the Tukey Honest Significant  
201 Differences (HSD) test. We performed the statistical analysis using R, v3.4.1 ([https://www.r-](https://www.r-project.org/)  
202 [project.org/](https://www.r-project.org/)) and made the figures using ggplot2, v3.1.0 (Wickerham 2016), and ggpubfigs,  
203 v1.0.0 (Steenwyk 2020).

204

### 205 **Estimation of mutational bias and rate of sequence evolution**

206 To characterize the mutational spectra and estimate the rate of sequence evolution between HLT  
207 and LLT, we first identified and aligned orthologous sequences across all eight genomes.  
208 Orthologous single-copy protein sequences from genes present in all eight genomes ( $n = 823$ )  
209 were identified using the BUSCO, v4.0.4 (Waterhouse et al. 2018) pipeline and the OrthoDB,  
210 v10, Ascomycota database (Creation date: 2019-11-20) (Kriventseva et al. 2019). We hereafter  
211 refer to the 823 single-copy genes as BUSCO genes. BUSCO genes were aligned using MAFFT,  
212 v7.402 (Kato et al. 2002), using the same settings described above. Codon-based alignments  
213 were generated by threading the corresponding nucleotide sequences onto the protein alignment  
214 using 'thread\_dna' function in PhyKIT, v0.1 (Steenwyk et al. 2020).

215

216 To examine patterns of substitutions, we used codon-based alignments to identify nucleotides  
217 that differed in a given taxon of interest compared to *C. variabilis*, which was the sister taxon to  
218 a clade comprised of the other seven genomes of interest in the Ascomycota phylogeny. More  
219 specifically, we compared the character states for a species of interest to *C. variabilis* for each  
220 site of each alignment, tracking codon position information (i.e., first, second, or third codon  
221 position). We also determined if the substitution was a transition or transversion and examined

222 substitution directionality (e.g., A|T to G|C or G|C to A|T) using *C. variabilis* as the outgroup.  
223 These analyses were completed using custom python scripts that utilize functions in Biopython,  
224 v1.70 (Cock et al. 2009).  
225  
226 Finally, we used the codon alignments to compare the rate of sequence evolution between HLT  
227 and LLT. Specifically, we measured the ratio of the rate of nonsynonymous substitutions to the  
228 rate of synonymous substitutions (dN/dS or  $\omega$ ) along the species phylogeny for each gene using  
229 the CODEML function in PAML, v4.9 (Yang 2007). For each test, the null hypothesis ( $H_0$ ) was  
230 that all branches had the same  $\omega$  value (model = 0); the alternative hypothesis ( $H_A$ ) was that all  
231 HLT branches, including the branch of their most recent common ancestor, had one  $\omega$  value and  
232 all other branches had a distinct  $\omega$  value (model = 2). To determine if the alternative hypothesis  
233 was a better fit than the null hypothesis ( $\alpha = 0.05$ ) we used a likelihood ratio test.

234

## 235 **Results**

### 236 **MMR genes are highly conserved across the fungal phylum Ascomycota**

237 By examining the presence of 52 MMR genes using a combination of sequence similarity search  
238 algorithms across the genomes of 1,107 fungal species, we found that the MMR pathway is  
239 highly conserved across Ascomycota (a median of 49 / 52 MMR genes per species; Fig. 2; File  
240 S1). Sixteen genes were present in all species; these included five recognition genes (*MSH1*,  
241 *MSH2*, *MSH3*, *MSH4*, and *MSH6*), one incision gene (*MLH1*), one removal gene (*DIN7*), five  
242 resynthesis genes (*CDC6*, *RFC2*, *RFC3*, *RFC4*, and *RFC5*), and all four ligation genes (*ADL1*,  
243 *CDC17*, *CDC9*, and *LIG1*). Few genes experienced extensive loss. Of the 11 most commonly  
244 lost genes, which were lost in >5% of species, two (*MYH1* and *UVE1*) were lost in the common

245 ancestor of Saccharomycotina, in addition to losses observed in other taxa. The remaining nine  
246 genes are unevenly distributed across functions; seven are involved in DNA resynthesis (*CDC27*,  
247 *CDM1*, *POL32*, *POLD3*, *POLD4*, *RPA3*, and *SSB3*), one is involved in mismatch recognition  
248 (*HSM3*), one is involved in incision (*HNT3*). These findings suggest that genes in the MMR  
249 pathway are well conserved across Ascomycota.

250

251 A comparison of our results with those reported in Milo et al. (2019) revealed similar patterns of  
252 gene presence and absence. For example, Milo et al. (2019) found that *MYH1* was absent from  
253 much of Pezizomycotina, which is consistent with our results. However, we did identify a few  
254 differences (inferred losses by Milo et al. (2019) vs. inferred presence in our analyses), which  
255 suggest that our pipeline is more conservative in classifying gene losses. We surmise that these  
256 differences stem from differences in the gene detection pipelines employed and the divergent  
257 objectives of the two studies; Milo et al. (2019) aimed to identify orthologs via a reciprocal best  
258 BLAST hit approach, whereas we aimed to identify homologs using pHMMs with absences  
259 verified using TBLASTN.

260

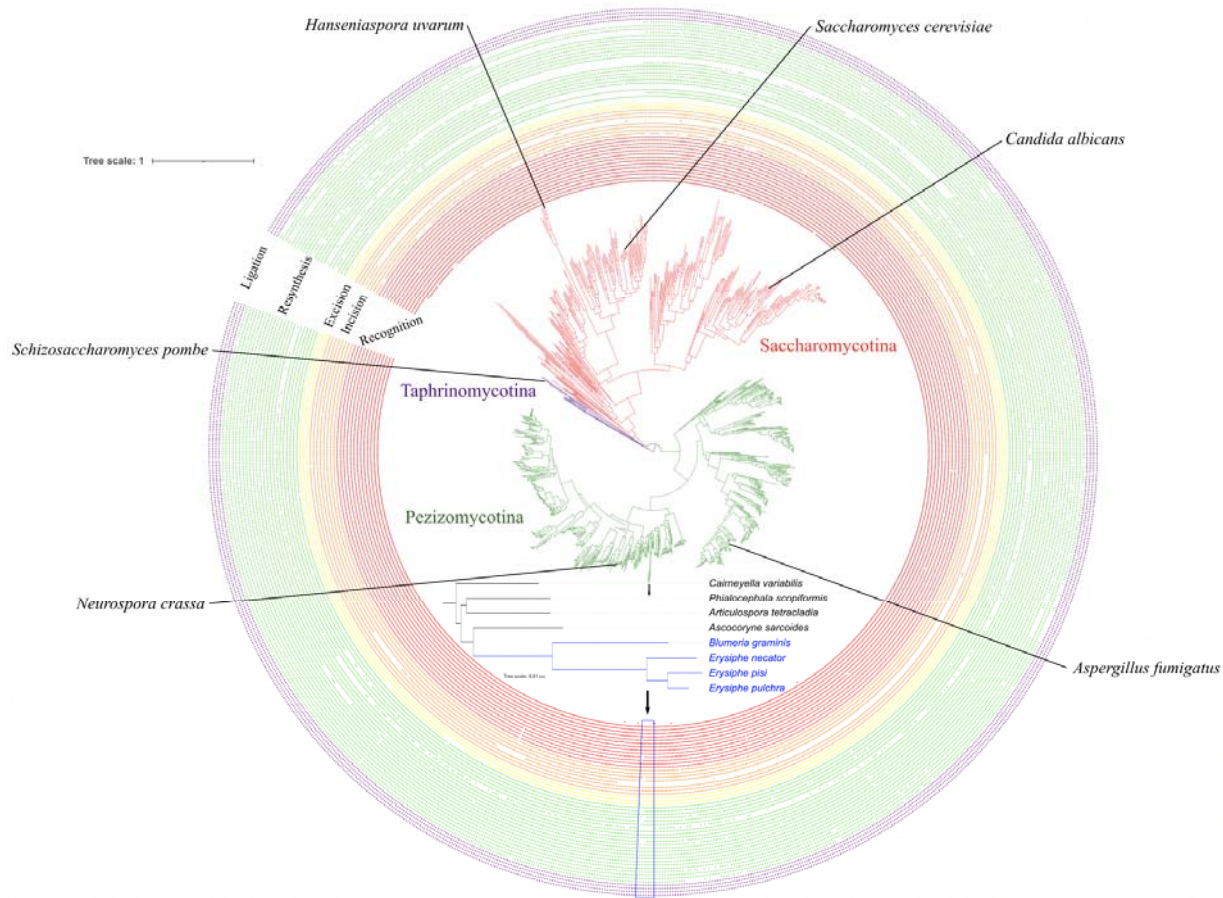

261

262 **Fig. 2. Conservation of mismatch repair (MMR) pathway genes across the fungal phylum**  
263 **Ascomycota.** MMR genes are generally highly conserved across the phylum. A few model  
264 organisms and species of particular interest to medicine and agriculture are labeled as well as a  
265 representative species of the faster-evolving *Hanseniaspora* lineage. Genes are colored  
266 according to their function; red is recognition, orange is incision, yellow is excision, green is  
267 resynthesis, and purple is ligation. Branches are colored by subphylum; budding yeasts /  
268 Saccharomycotina (n = 332 species) are in red, fission yeasts / Taphrinomycotina (n = 14  
269 species) are in purple, and filamentous fungi / Pezizomycotina (n = 761 species) are in green.  
270 Taxon names have been omitted from the phylogeny for visualization purposes; the phylogenetic  
271 tree with taxon names can be found in Figure S1 and Shen et al. (2020). The inset phylogenetic  
272 tree shows the HLT (in blue) and LLT (in black), with the blue box beneath highlighting them.  
273

#### 274 **Extensive loss of MMR genes in a lineage of powdery mildews**

275 Although MMR genes are highly conserved across Ascomycota, we found that a lineage of  
276 obligate plant parasite powdery mildews have among the fewest MMR genes of the 1,107  
277 Ascomycota species examined. *Erysiphe necator* has lost 10 MMR genes, *Erysiphe pisi* 22, and

278 *Erysiphe pulchra* 9 (Fig. 3). *E. necator* has been previously documented to have a high rate of  
279 genome evolution (Milo et al. 2019) and genomic instability (Jones et al. 2014). *Blumeria*  
280 *graminis*, which is sister to the *Erysiphe* genus, has lost 6 MMR genes; previous studies reported  
281 extensive gene loss in diverse pathways in this species, generally in genes thought to be  
282 unnecessary for their biotrophic lifestyle (Spanu et al. 2010). In contrast, the closely related  
283 species *Cairneyella variabilis* and *Phialocephala scopiformis* only lack *MYH1*, an adenine DNA  
284 glycosylase that is lost in most filamentous fungi (Chang et al. 2001). In addition to *MYH1*,  
285 closely related species *Articulospora tetracladia* and *Ascocoryne sarcoides* lack *HSM3*, which  
286 has been lost in almost all Pezizomycotina genomes. *A. sarcoides* is also lacking *POL32*, a DNA  
287 polymerase  $\delta$  subunit, which is part of a larger complex that participates in multiple DNA repair  
288 pathways, including nucleotide excision repair and base excision repair (Gerik et al. 1998). Much  
289 like the rest of the phylum, genes associated with resynthesis are lost more frequently, but  
290 *Erysiphe* and *Blumeria* have lost genes associated with all MMR functions (Table 1) except  
291 ligation. In addition, seven of the observed MMR gene losses occur nowhere else in  
292 Ascomycota: *EXO1* (excision), *MLH2* (incision), *MLH3* (incision), *MSH5* (recognition), *PMS1*  
293 (incision), *PMS2* (incision), and *RFC1* (resynthesis). Taken together, these results suggest that  
294 HLT may have a partially functional MMR pathway.

295  
296 While select *Erysiphe* taxa have lost more genes than any other species, there are other species  
297 with moderate to high levels of MMR gene loss across the phylum. A total of 186 species have  
298 lost 6 or more genes across Ascomycota: 4 species in subphylum Taphrinomycotina, 161 in  
299 Saccharomycotina, and 21 in Pezizomycotina. The disproportionate number of  
300 Saccharomycotina and Taphrinomycotina species is consistent with our knowledge that

301 organisms in these lineages have, on average, a smaller number of DNA repair genes compared  
302 to Pezizomycotina (Milo et al. 2019). MMR gene loss in certain Saccharomycotina lineages,  
303 such as in some species from the genera *Hanseniaspora* (Steenwyk, Opulente, et al. 2019),  
304 *Tetrapisispora*, and *Dipodascus*, is comparable to the loss observed in HLT; however, only 18  
305 other species in Ascomycota showed MMR gene loss to the same degree as any *Erysiphe*  
306 species. In general, species with elevated levels of gene loss primarily lost genes noted as  
307 commonly lost earlier in this paper (see “MMR genes are highly conserved across the fungal  
308 phylum Ascomycota”), with occasional losses in other genes.

309  
310 There was a striking discrepancy between the presence and absence of MMR genes inferred by  
311 pHMM versus TBLASTN in HLT that was not observed in other species. When measured by  
312 pHMM, *E. pulchra* lost 42 MMR genes, as opposed to 9 when confirmed with TBLASTN, and  
313 *E. necator* and *E. pisi* lost 51 MMR genes, as opposed to 10 and 22, respectively. *B. graminis*  
314 lost 9 MMR genes by pHMM and 6 when absences were verified with TBLASTN. In the closely  
315 related species *C. variabilis*, *P. scopiformis*, *A. tetracladia*, and *A. sarcoides*, genes deemed  
316 absent by HMM also did not have a match for TBLASTN. This is unexpected, given that  
317 pHMMs are more sensitive in sequence similarity searches and typically outperform TBLASTN  
318 when detecting genes on an evolutionary timescale (Yoon 2009). Given that the inputs in the  
319 pHMM-based searches were gene annotation predictions and the inputs in the TBLASTN-based  
320 searches were genome assemblies, it is possible that the genes missed by pHMMs are genes that  
321 have not been annotated. Many of the TBLASTN hits are not located near a start codon,  
322 suggesting that they may have been pseudogenized.

323

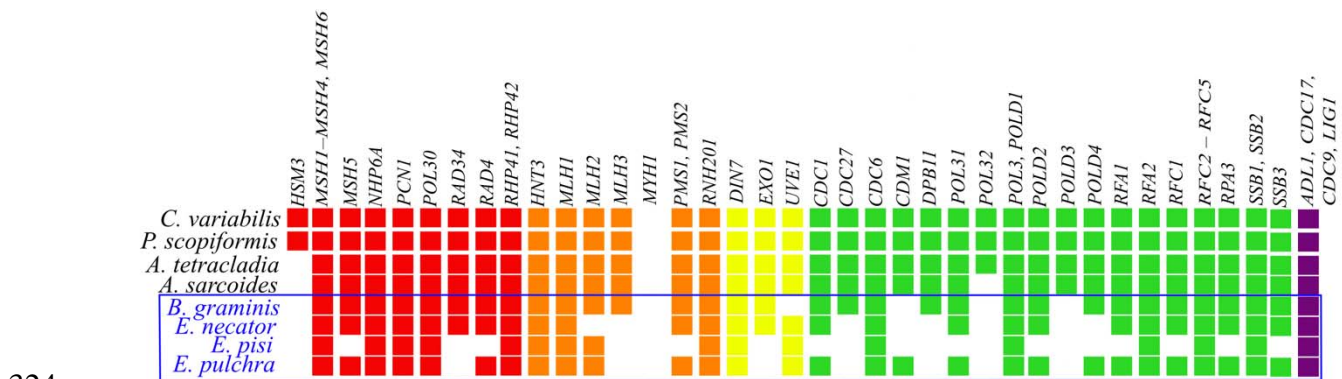

324  
 325 **Fig. 3: The powdery mildews *Erysiphe* and *Blumeria* have lost many more mismatch repair**  
 326 **(MMR) pathway genes than closely related species.** High loss taxa (HLT; shown in blue font)  
 327 have lost 6 – 22 MMR genes, while low loss taxa (LLT; shown in black font) and most other  
 328 species in the rest of the Ascomycota phylum have lost 1 – 3 genes. Note that the losses of  
 329 *EXO1*, *MLH2*, *MLH3*, *MSH5*, *PMS1*, *PMS2*, and *RFC1* are uniquely observed in HLT. Genes  
 330 are colored according to their function; red is recognition, orange is incision, yellow is excision,  
 331 green is resynthesis, and purple is ligation.  
 332

### 333 High MMR gene loss taxa show increased number and length of microsatellites

334 Examination of microsatellites revealed microsatellite expansions in HLT in comparison to LLT.  
 335 Specifically, we found statistically significant increases in the number and length of  
 336 microsatellites in HLT compared to LLT (Fig. 4A, Tables 2, 3, S1, and S2). Overall, after  
 337 controlling for genome size, HLT had significantly more microsatellites than LLT ( $F = 34.83$ ;  $p$   
 338  $< 0.001$ ; ANOVA; Tables 3 and S1). This effect was driven by the very large increase in the  
 339 number of homopolymer runs in *Erysiphe* and *Blumeria* (Fig. 4C) ( $p < 0.001$ ; Tukey HSD; Table  
 340 S1). There was no statistically significant difference between the groups in the numbers of  
 341 microsatellites with a 2-6 bp motif length (Table S1). HLT showed significantly higher average  
 342 microsatellite lengths at every motif size than LLT (Fig. 4B) ( $p < 0.01$  for 1 bp,  $p < 0.001$  for all  
 343 other motif lengths; Wilcoxon rank sum test; Table S2). HLT have an increased number of  
 344 monomeric runs (after controlling for genome size) and an increase in length of microsatellites of  
 345 all motif lengths, suggesting that the MMR pathway's function is compromised in these species.



346

347 **Table 2. MMR gene loss is associated with an increased number of microsatellites**

| Species               | Group | Genome Size (Mb) | 1 bp | 2 bp | 3 bp | 4 bp | 5 bp | 6 bp |
|-----------------------|-------|------------------|------|------|------|------|------|------|
| <i>A. tetracladia</i> | LLT   | 41.8             | 306  | 725  | 1028 | 525  | 288  | 174  |
| <i>A. sarcoides</i>   | LLT   | 34.3             | 213  | 677  | 601  | 365  | 164  | 75   |
| <i>C. variabilis</i>  | LLT   | 50.7             | 420  | 374  | 336  | 54   | 47   | 69   |
| <i>P. scopiformis</i> | LLT   | 48.9             | 325  | 475  | 840  | 301  | 159  | 71   |
| <i>B. graminis</i>    | HLT   | 124.5            | 6379 | 1047 | 1752 | 659  | 389  | 190  |
| <i>E. necator</i>     | HLT   | 52.5             | 4616 | 2829 | 1135 | 1172 | 290  | 145  |
| <i>E. pisi</i>        | HLT   | 69.3             | 4463 | 1841 | 1303 | 521  | 80   | 125  |
| <i>E. pulchra</i>     | HLT   | 63.5             | 2681 | 969  | 990  | 522  | 89   | 87   |

348 Low loss taxa (LLT): *Articulospora tetracladia*, *Ascocoryne sarcoides*, *Cairneyella variabilis*, *Phialocephala*  
 349 *scopiformis*

350 High loss taxa (HLT): *Blumeria graminis*, *Erysiphe necator*, *Erysiphe pisi*, *Erysiphe pulchra*

351

352 **Table 3. Statistical analysis shows significant differences in number of microsatellites**  
 353 **between high loss taxa (HLT) and low loss taxa (LLT)**

|                                   | <sup>a</sup> Df | <sup>b</sup> Sum Sq      | <sup>c</sup> Mean Sq      | <sup>d</sup> F-value | p-value                 |
|-----------------------------------|-----------------|--------------------------|---------------------------|----------------------|-------------------------|
| Group (HLT vs LLT)                | 1               | 1.610 x 10 <sup>-9</sup> | 1.610 x 10 <sup>-9</sup>  | 19.40                | 9.12 x 10 <sup>-5</sup> |
| Motif length                      | 5               | 5.849 x 10 <sup>-9</sup> | 1.170 x 10 <sup>-9</sup>  | 14.09                | 1.19 x 10 <sup>-7</sup> |
| <sup>e</sup> Group x Motif length | 5               | 4.632 x 10 <sup>-9</sup> | 9.264 x 10 <sup>-9</sup>  | 11.16                | 1.52 x 10 <sup>-6</sup> |
| Residuals                         | 36              | 2.989 x 10 <sup>-9</sup> | 8.300 x 10 <sup>-11</sup> | N/A                  | N/A                     |

354 <sup>a</sup>Degrees of freedom

355 <sup>b</sup>Sum of the squares of the deviations of all the observations from their mean

356 <sup>c</sup>Sample variance: sum of squares divided by degrees of freedom

357 <sup>d</sup>Test statistic from ANOVA analysis

358 <sup>e</sup>Interaction between group and motif length

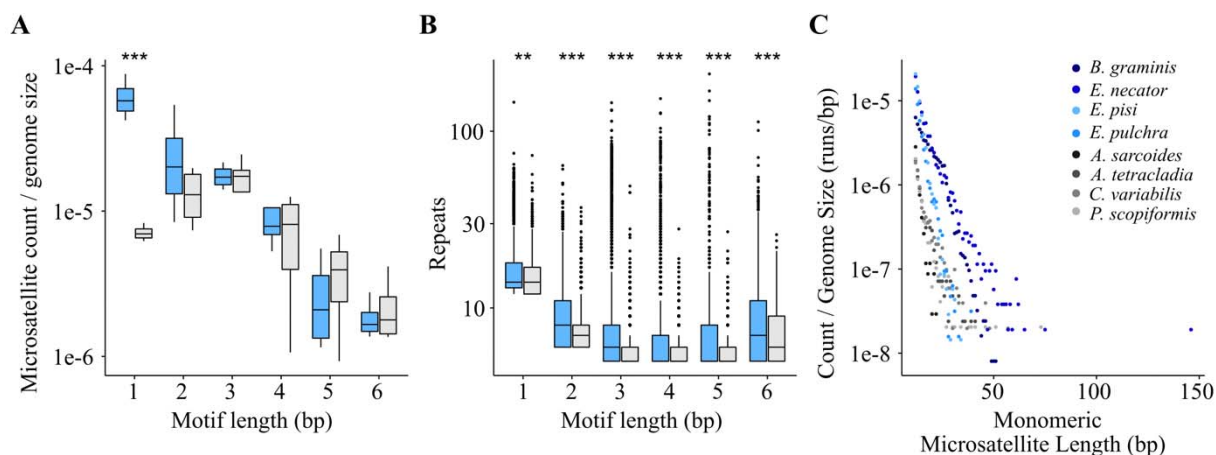

359

360 **Fig. 4: Genomes of high loss taxa (HLT; blue bars) show a proliferation of monomers and**  
 361 **an increase in their microsatellite lengths compared to low loss taxa (LLT; grey bars).** (A)

362 Examination of microsatellites in HLT and LLT (gray bars) showed a significant increase in the  
 363 number of monomeric runs in HLT ( $p < 0.001$ ; ANOVA, Tukey HSD; Tables 3 and S1). (B)

364 Microsatellites of each motif length are significantly longer in HLT ( $p < 0.01$  for 1 bp,  $p < 0.001$

365 for all other motif lengths; Wilcoxon rank sum test; Table S2). (C) Monomeric runs are longer  
366 and more numerous in HLT than LLT (Tables S1 and S2).  
367

### 368 **High loss taxa show mutational biases**

369 By examining patterns of substitutions among HLT and LLT we found that HLT displayed  
370 stronger mutational biases associated with impaired DNA repair pathway function in comparison  
371 to LLT. For example, significantly more substitutions were observed at all codon positions in  
372 HLT vs. LLT (Fig. 5A) ( $p < 0.01$ ; Tukey HSD; Table S3) and a significant bias towards  
373 substitutions in the A|T direction (Fig. 5B) ( $p < 0.001$ ; Tukey HSD; Table S4). HLT also had a  
374 lower ratio of transitions to transversions ( $0.92 \pm 0.04$ ) than LLT ( $0.99 \pm 0.02$ ), though this is not  
375 statistically significant (Fig. 5C) ( $p = 0.06$ ; Wilcoxon rank sum exact test; Table S5).  
376 Additionally, HLT had lower GC content (HLT:  $40.10 \pm 0.02\%$  vs. LLT:  $47.49 \pm 0.01\%$ ). Linear  
377 regression revealed a significant decrease ( $F = 11.7$ ,  $p = 0.01$ ; Table S6) in GC content of the  
378 genomes as the number of MMR genes lost increases (Fig. 5D).

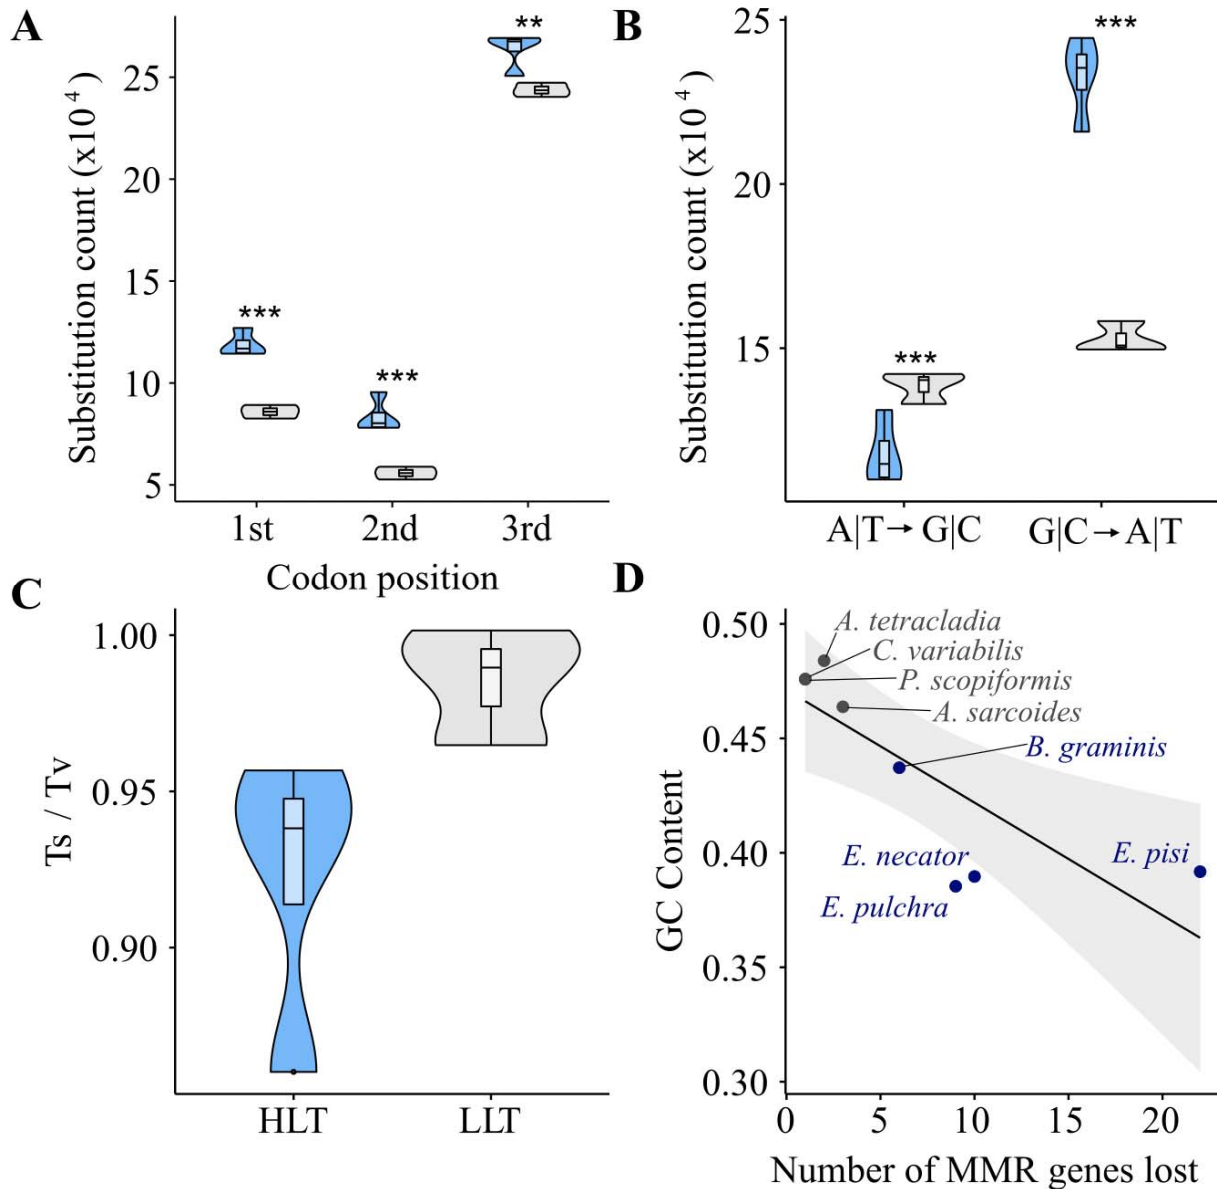

379

380 **Fig. 5: High loss taxa (HLT) show diverse types of mutational bias compared to low loss**  
 381 **taxa (LLT).** (A) HLT (blue bars / fonts) show increased counts in base substitution at every  
 382 codon position when compared to LLT (gray bars / fonts) ( $p < 0.01$ ; ANOVA, Tukey HSD;  
 383 Table S3). (B) HLT show significant mutational bias towards mutation in the A|T direction,  
 384 while this trend is not significant in LLT ( $p < 0.001$ ;  $p = 0.27$ ; ANOVA, Tukey HSD; Table S4).  
 385 (C) HLT show a decreased ratio of transitions to transversions when compared to LLT, though  
 386 this difference is not statistically significant ( $p = 0.06$ ; Table S5). (D) Genome GC content  
 387 decreases with increasing MMR gene loss (adjusted  $R^2 = 0.6045$ ;  $p = 0.01$ ; linear regression;  
 388 Table S6).

389

390 **High loss taxa have experienced accelerated rates of sequence evolution**

391 To test if the rate of evolution of HLT differed from that of LLT, we performed  $\omega$ -based branch  
392 tests. Our null hypothesis was that all branches of the phylogeny for our selected eight species  
393 had the same rate of evolution, while our alternate hypothesis posited that HLT branches,  
394 including the branch of their most recent common ancestor, experienced a different rate of  
395 sequence evolution than LLT branches. We found that 60.75% of genes rejected the null  
396 hypothesis ( $\alpha = 0.05$ ;  $n = 500$ ) and 39.25% failed to reject the null ( $n = 323$ ) (Fig. 6A; File S2).  
397 Of the genes which rejected the null hypothesis, 79.80% ( $n = 399$ ) experienced higher rates of  
398 substitution in HLT, which constitutes 48.48% of all genes tested (Fig. 6A). Among the genes  
399 that rejected the null hypothesis, the difference between the  $\omega$  values for the HLT (median  $\omega =$   
400 0.0899) and the LLT (median  $\omega = 0.0567$ ) showed accelerated rates of substitution for HLT  
401 branches (Fig. 6B). These results suggest that MMR gene loss is associated with a genome-wide  
402 signature of accelerated mutation rates.

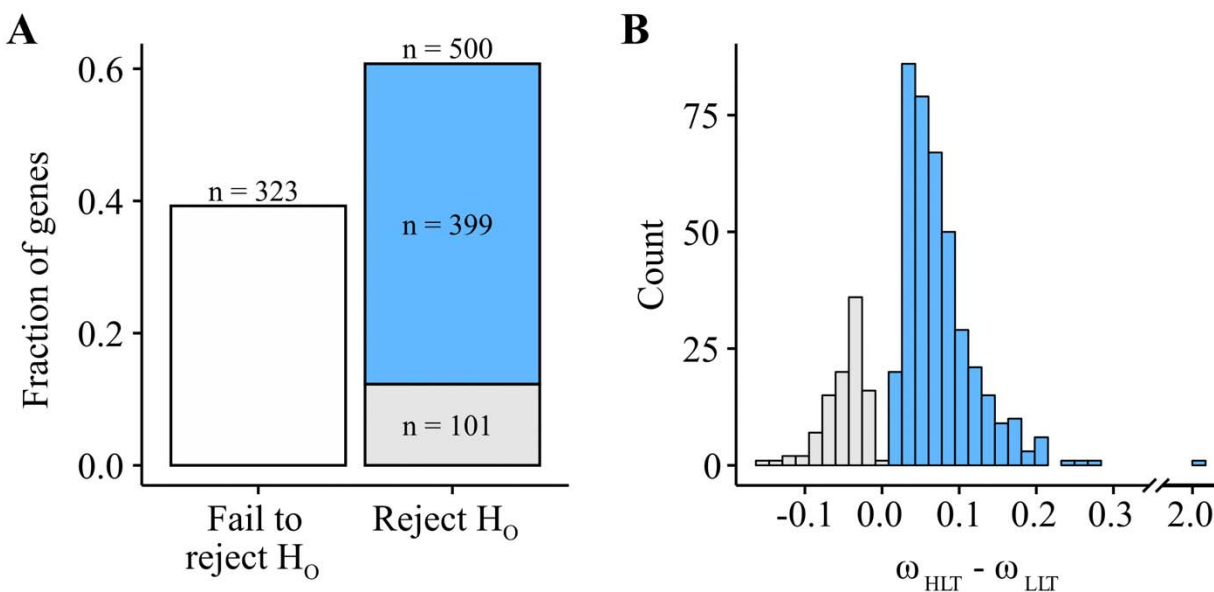

403  
404 **Fig. 6: Powdery mildew high loss taxa (HLT) show accelerated rates of evolution.** (A) Most  
405 (60.75%;  $n = 500$ ) BUSCO genes reject the null hypothesis that HLT branches experience the  
406 same rate of substitution as LLT branches. 48.48% of BUSCO genes support a higher rate of  
407 evolution for HLT ( $n = 399$ ; in blue), 12.27% support a higher rate of evolution for LLT ( $n =$

408 101; in grey), and 39.25% (n = 323) fail to reject the null hypothesis that the rate of substitution  
409 is uniform across HLT and LLT branches (in white). Among genes that support the alternative  
410 hypothesis, 79.80% (n = 399) support that *Erysiphe* and *Blumeria* evolve more quickly than  
411 LLT. (B) Among genes which reject the null hypothesis, the distribution of differences between  
412  $\omega$  values for HLT and LLT branches show elevated substitution rates in HLT.

413  
414

## 415 **DISCUSSION**

416  
417 Using sequence similarity searches, we examined the conservation of the MMR pathway across  
418 1,107 ascomycete species. The near universal conservation of the vast majority of MMR genes  
419 across the phylum confirms this pathway's known critical role for DNA maintenance (Fukui  
420 2010; Schofield & Hsieh 2003; Kunkel & Erie 2005). However, we also discovered that a  
421 lineage of *Erysiphe* and *Blumeria* powdery mildews, named HLT, have experienced significant  
422 MMR gene loss (Fig. 3). HLT exhibit increases in monomer count, microsatellite length,  
423 mutational biases, and rate of evolution (Figs. 4, 5, and 6), suggesting that the function of their  
424 MMR pathway may be impaired. While DNA repair mechanisms are present in all eukaryotes  
425 and are highly conserved, there is mounting evidence of exceptions to this rule in the fungal  
426 kingdom (Steenwyk, Opulente, et al. 2019; Steenwyk 2021). The increased MMR gene absence  
427 observed in HLT correlates with changes in the microsatellite compositions of their genomes.  
428 The significant difference between HLT and LLT in the number of monomeric runs is consistent  
429 with mutational patterns present in human cancers and MMR deficient yeast (Arzimanoglou et  
430 al. 1998; Lang et al. 2013). Monomeric runs are the most prone to replication fork slippage and  
431 are used to diagnose MSI in tumors (Richman 2015). In addition to an increase in the number of  
432 monomeric runs (Fig. 4A), HLT showed significantly longer microsatellites for each motif  
433 length than LLT (Fig. 4B), which suggests impaired MMR function and increased replication  
434 fork slippage.

435  
436 Examination of HLT genomes revealed mutational signatures suggesting that the MMR pathway  
437 has been impaired by the observed gene losses. Patterns of substitutions suggest the loss of  
438 MMR genes leads to increased substitution rates (Fig. 5A) and lower GC content (Fig. 5D).  
439 More specifically, the prominent A|T bias of substitutions in the HLT is likely driven by the  
440 known A|T bias of mutations previously observed in bacteria and eukaryotes, including *S.*  
441 *cerevisiae* (Hershberg & Petrov 2010; Keightley et al. 2009; Zhu et al. 2014; Lynch 2010).  
442 Furthermore, GC content decreases in proportion to the number of MMR genes lost in the HLT  
443 and LLT, which was also observed among *Hanseniaspora*, a lineage of budding yeasts that have  
444 lost diverse DNA repair genes (Steenwyk, Opulente, et al. 2019). There is no significant  
445 difference between the transition to transversion (Ts/Tv) ratios of the HLT ( $0.92 \pm 0.04$ ) and  
446 LLT ( $0.99 \pm 0.02$ ), though the trend follows what we would expect for HLT having less efficient  
447 DNA repair. Both lineages exhibit near-neutral Ts/Tv ratios (Zhu et al. 2014; Lynch et al. 2008).  
448 Examination of  $\omega$  values suggests that faster rates of sequence evolution in HLT compared to the  
449 LLT may be associated with MMR gene loss. Long branches, which reflect more substitutions  
450 per site, have been previously reported elsewhere for *E. necator* (Milo et al. 2019), providing  
451 independent support to our findings.

452  
453 Loss of function in the MMR pathway may be advantageous in certain environments or under  
454 certain lifestyles. For example, strains of human pathogens with impaired MMR function are  
455 found in environments where antifungal drugs are present. Some of these strains have evolved  
456 drug resistance, so the elevated mutation rate generated by MMR gene loss may be adaptive  
457 under certain stressful situations (Billmyre et al. 2017, 2020; Rhodes et al. 2017). Loss in

458 separate DNA repair pathways is also present in other parasites and may contribute to elevated  
459 mutation rates. Organisms with parasitic lifestyles tend to evolve more rapidly than free-living  
460 organisms; while these mechanisms are unknown, previous work has identified that the loss of  
461 the classical nonhomologous end joining (C-NHEJ) pathway is common in this lifestyle and may  
462 even be a contributing factor (Nenarokova et al. 2019). Previous studies of genome structure in  
463 *E. necator* have found genome expansion largely driven by transposable elements and suggest  
464 that genome instability, particularly in copy number variants, can mediate rapid evolution of  
465 fungicidal resistance (Jones et al. 2014). The evolution of fungicide resistance in powdery  
466 mildews has massive implications for agriculture; major crops are impacted by these pathogens  
467 and some are able to quickly evolve resistance to antifungal chemicals, with resistance evolution  
468 accelerated by increased use (Jones et al. 2014; Vielba-Fernández et al. 2020). More broadly,  
469 genome instability among HLT taxa reflects their parasitic lifestyle, which is associated with  
470 gene loss and plastic genomic architecture (Schmidt & Panstruga 2011). Gene loss in primary  
471 and secondary metabolism, enzymes acting on carbohydrates, and transporters, has been  
472 documented in *Blumeria graminis*, as well as massive expansion in retrotransposons and genome  
473 size, reflecting extreme genomic changes associated with its parasitic lifestyle (Spanu et al.  
474 2010). Given their extreme genomic changes and importance to agriculture, *Blumeria* and  
475 *Erysiphe* may be novel models to study the outcome and evolutionary trajectory of sustained loss  
476 of MMR pathways.

477

478

479 **Funding**

480 M.A.P. was partially supported by the Vanderbilt Undergraduate Summer Research Program and  
481 the Goldberg Family Immersion Fund. J.L.S. and A.R. were supported by the Howard Hughes  
482 Medical Institute through the James H. Gilliam Fellowships for Advanced Study Program.  
483 A.R.'s laboratory received additional support from the Burroughs Wellcome Fund, the National  
484 Science Foundation (DEB-1442113), and the National Institutes of Health/National Institute of  
485 Allergy and Infectious Diseases (R56AI146096). X.-X.S. was supported by the National Natural  
486 Science Foundation of China (no. 32071665) and the Young Scholar 1000 Talents Plan.

487

#### 488 **Acknowledgements**

489 We thank Qianhui Zheng for performing exploratory analysis on the HLT and LLT genomes.

490

#### 491 **Data availability statement**

492 Supporting statistical analysis, the Ascomycota phylogeny with species names, and 2  
493 supplementary data files (MMR gene presence/absence matrix and  $\omega$  output) are available via  
494 figshare at <https://doi.org/10.6084/m9.figshare.14410994.v1>. The data supporting the phylogeny  
495 of Ascomycota are available at <https://doi.org/10.6084/m9.figshare.12751736.v4>.

496

#### 497 **References**

498 Arzimanoglou II, Gilbert F, Barber HRK. 1998. Microsatellite instability in human solid tumors.  
499 Cancer. 82:1808–1820. doi: [https://doi.org/10.1002/\(SICI\)1097-  
500 0142\(19980515\)82:10<1808::AID-CNCR2>3.0.CO;2-J](https://doi.org/10.1002/(SICI)1097-0142(19980515)82:10<1808::AID-CNCR2>3.0.CO;2-J).  
501 Ashburner M et al. 2000. Gene Ontology: tool for the unification of biology. Nat. Genet. 25:25–  
502 29. doi: 10.1038/75556.



503 Beier S, Thiel T, Münch T, Scholz U, Mascher M. 2017. MISA-web: a web server for  
504 microsatellite prediction. *Bioinformatics*. 33:2583–2585. doi: 10.1093/bioinformatics/btx198.

505 Billmyre RB, Applen Clancey S, Li LX, Doering TL, Heitman J. 2020. 5-fluorocytosine  
506 resistance is associated with hypermutation and alterations in capsule biosynthesis  
507 in *Cryptococcus*. *Nat. Commun*. 11:127. doi: 10.1038/s41467-019-13890-z.

508 Billmyre RB, Clancey SA, Heitman J. 2017. Natural mismatch repair mutations mediate  
509 phenotypic diversity and drug resistance in *Cryptococcus deuterogattii* Rokas, A, editor. *Elife*.  
510 6:e28802. doi: 10.7554/eLife.28802.

511 Boland CR, Goel A. 2010. Microsatellite Instability in Colorectal Cancer. *Gastroenterology*.  
512 138:2073-2087.e3. doi: 10.1053/j.gastro.2009.12.064.

513 Campbell BB et al. 2017. Comprehensive Analysis of Hypermutation in Human Cancer. *Cell*.  
514 171:1042-1056.e10. doi: 10.1016/j.cell.2017.09.048.

515 Chang D-Y, Gu Y, Lu A-L. 2001. Fission yeast (*Schizosaccharomyces pombe*) cells defective in  
516 the MutY-homologous glycosylase activity have a mutator phenotype and are sensitive to  
517 hydrogen peroxide. *Mol. Genet. Genomics*. 266:336–342. doi: 10.1007/s004380100567.

518 Cherry JM et al. 2012. *Saccharomyces* Genome Database: the genomics resource of budding  
519 yeast. *Nucleic Acids Res*. 40:D700–D705. doi: 10.1093/nar/gkr1029.

520 Cock PJA et al. 2009. Biopython: freely available Python tools for computational molecular  
521 biology and bioinformatics. *Bioinformatics*. 25:1422–1423. doi: 10.1093/bioinformatics/btp163.

522 Ellegren H. 2004. Microsatellites: simple sequences with complex evolution. *Nat. Rev. Genet*.  
523 5:435–445. doi: 10.1038/nrg1348.

524 Friedberg EC et al. 2005. *DNA Repair and Mutagenesis*. 2nd ed. doi: 10.1128/9781555816704.

- 525 Fukui K. 2010. DNA Mismatch Repair in Eukaryotes and Bacteria. *J. Nucleic Acids*. 2010. doi:  
526 10.4061/2010/260512.
- 527 Gerik KJ, Li X, Pautz A, Burgers PMJ. 1998. Characterization of the Two Small Subunits of  
528 *Saccharomyces cerevisiae* DNA Polymerase  $\delta^*$ . *J. Biol. Chem.* 273:19747–19755. doi:  
529 10.1074/jbc.273.31.19747.
- 530 Giglia-Mari G, Zotter A, Vermeulen W. 2010. DNA damage response. *Cold Spring Harb.*  
531 *Perspect. Biol.* 3:a000745–a000745. doi: 10.1101/cshperspect.a000745.
- 532 Hershberg R, Petrov DA. 2010. Evidence That Mutation Is Universally Biased towards AT in  
533 Bacteria. *PLOS Genet.* 6:e1001115. doi: 10.1371/journal.pgen.1001115.
- 534 Hsieh P, Zhang Y. 2017. The Devil is in the details for DNA mismatch repair. *Proc. Natl. Acad.*  
535 *Sci.* 114:3552 LP – 3554. doi: 10.1073/pnas.1702747114.
- 536 Johnson LS, Eddy SR, Portugaly E. 2010. Hidden Markov model speed heuristic and iterative  
537 HMM search procedure. *BMC Bioinformatics.* 11:431. doi: 10.1186/1471-2105-11-431.
- 538 Jones L et al. 2014. Adaptive genomic structural variation in the grape powdery mildew  
539 pathogen, *Erysiphe necator*. *BMC Genomics.* 15:1081. doi: 10.1186/1471-2164-15-1081.
- 540 Kanehisa M, Goto S. 2000. KEGG: Kyoto Encyclopedia of Genes and Genomes. *Nucleic Acids*  
541 *Res.* 28:27–30. doi: 10.1093/nar/28.1.27.
- 542 Katoh K, Misawa K, Kuma K, Miyata T. 2002. MAFFT: a novel method for rapid multiple  
543 sequence alignment based on fast Fourier transform. *Nucleic Acids Res.* 30:3059–3066. doi:  
544 10.1093/nar/gkf436.
- 545 Keightley PD et al. 2009. Analysis of the genome sequences of three *Drosophila melanogaster*  
546 spontaneous mutation accumulation lines. *Genome Res.* 19:1195–1201. doi:  
547 10.1101/gr.091231.109.

548 Kriventseva E V et al. 2019. OrthoDB v10: sampling the diversity of animal, plant, fungal,  
549 protist, bacterial and viral genomes for evolutionary and functional annotations of orthologs.  
550 Nucleic Acids Res. 47:D807–D811. doi: 10.1093/nar/gky1053.

551 Kunkel TA, Erie DA. 2005. DNA MISMATCH REPAIR. Annu. Rev. Biochem. 74:681–710.  
552 doi: 10.1146/annurev.biochem.74.082803.133243.

553 Lang GI, Parsons L, Gammie AE. 2013. Mutation Rates, Spectra, and Genome-Wide  
554 Distribution of Spontaneous Mutations in Mismatch Repair Deficient Yeast. G3  
555 Genes|Genomes|Genetics. 3:1453 LP – 1465. doi: 10.1534/g3.113.006429.

556 Lau A, Blitzblau H, Bell SP. 2002. Cell-cycle control of the establishment of mating-type  
557 silencing in *S. cerevisiae*. Genes Dev. . 16:2935–2945. doi: 10.1101/gad.764102.

558 Letunic I, Bork P. 2019. Interactive Tree Of Life (iTOL) v4: recent updates and new  
559 developments. Nucleic Acids Res. 47:W256–W259. doi: 10.1093/nar/gkz239.

560 Li H et al. 2009. The Sequence Alignment/Map format and SAMtools. Bioinformatics. 25:2078–  
561 2079. doi: 10.1093/bioinformatics/btp352.

562 Lock A et al. 2019. PomBase 2018: user-driven reimplementaion of the fission yeast database  
563 provides rapid and intuitive access to diverse, interconnected information. Nucleic Acids Res.  
564 47:D821–D827. doi: 10.1093/nar/gky961.

565 Lynch M et al. 2008. A genome-wide view of the spectrum of spontaneous mutations in yeast.  
566 Proc. Natl. Acad. Sci. 105:9272 LP – 9277. doi: 10.1073/pnas.0803466105.

567 Lynch M. 2010. Rate, molecular spectrum, and consequences of human mutation. Proc. Natl.  
568 Acad. Sci. U. S. A. 107:961–968. doi: 10.1073/pnas.0912629107.

569 Marti TM, Kunz C, Fleck O. 2002. DNA mismatch repair and mutation avoidance pathways. J.  
570 Cell. Physiol. 191:28–41. doi: <https://doi.org/10.1002/jcp.10077>.

- 571 Milo S, Harari-Misgav R, Hazkani-Covo E, Covo S. 2019. Limited DNA Repair Gene  
572 Repertoire in Ascomycete Yeast Revealed by Comparative Genomics. *Genome Biol. Evol.*  
573 11:3409–3423. doi: 10.1093/gbe/evz242.
- 574 Nenarokova A et al. 2019. Causes and Effects of Loss of Classical Nonhomologous End Joining  
575 Pathway in Parasitic Eukaryotes Heitman Greg Ouellette, Marc, JM, editor. *MBio.* 10:e01541-  
576 19. doi: 10.1128/mBio.01541-19.
- 577 Pearson WR. 2013. An Introduction to Sequence Similarity (“Homology”) Searching. *Curr.*  
578 *Protoc. Bioinforma.* 42:3.1.1-3.1.8. doi: 10.1002/0471250953.bi0301s42.
- 579 Dos Reis TF et al. 2019. The *Aspergillus fumigatus* Mismatch Repair MSH2 Homolog Is  
580 Important for Virulence and Azole Resistance. *mSphere.* 4:e00416-19. doi:  
581 10.1128/mSphere.00416-19.
- 582 Rhodes J et al. 2017. A Population Genomics Approach to Assessing the Genetic Basis of  
583 Within-Host Microevolution Underlying Recurrent Cryptococcal Meningitis Infection. *G3*  
584 *Genes|Genomes|Genetics.* 7:1165 LP – 1176. doi: 10.1534/g3.116.037499.
- 585 Richman, S. (2015). Deficient mismatch repair: Read all about it (Review). *Int J Oncol*, 47(4),  
586 1189–1202. doi: 10.3892/ijo.2015.3119.
- 587 Schmidt SM, Panstruga R. 2011. Pathogenomics of fungal plant parasites: what have we learnt  
588 about pathogenesis? *Curr. Opin. Plant Biol.* 14:392–399. doi: 10.1016/j.pbi.2011.03.006.
- 589 Schofield MJ, Hsieh P. 2003. DNA Mismatch Repair: Molecular Mechanisms and Biological  
590 Function. *Annu. Rev. Microbiol.* 57:579–608. doi: 10.1146/annurev.micro.57.030502.090847.
- 591 Shen X-X et al. 2020. Genome-scale phylogeny and contrasting modes of genome evolution in  
592 the fungal phylum Ascomycota. *Sci. Adv.* 6:eabd0079. doi: 10.1126/sciadv.abd0079.
- 593 Spanu PD et al. 2010. Genome Expansion and Gene Loss in Powdery Mildew Fungi Reveal

- 594 Tradeoffs in Extreme Parasitism. *Science* (80-. ). 330:1543 LP – 1546. doi:  
595 10.1126/science.1194573.
- 596 Steenwyk JL. 2021. Evolutionary Divergence in DNA Damage Responses among Fungi. *MBio*.  
597 12:e03348-20. doi: 10.1128/mBio.03348-20.
- 598 Steenwyk JL, Opulente DA, et al. 2019. Extensive loss of cell-cycle and DNA repair genes in an  
599 ancient lineage of bipolar budding yeasts. *PLOS Biol*. 17:e3000255.  
600 <https://doi.org/10.1371/journal.pbio.3000255>.
- 601 Steenwyk JL. 2020. JLSteenwyk/ggpubfigs: first release of ggpubfigs. doi:  
602 10.5281/ZENODO.4126988.
- 603 Steenwyk JL et al. 2020. PhyKIT: a UNIX shell toolkit for processing and analyzing  
604 phylogenomic data. *bioRxiv*. 2020.10.27.358143. doi: 10.1101/2020.10.27.358143.
- 605 Steenwyk JL, Shen X-X, Lind AL, Goldman GH, Rokas A. 2019. A Robust Phylogenomic Time  
606 Tree for Biotechnologically and Medically Important Fungi in the Genera *Aspergillus* and  
607 *Penicillium*; Boyle, JP, editor. *MBio*. 10:e00925-19. doi: 10.1128/mBio.00925-19.
- 608 Surtees JA, Alani E. 2004. Replication Factors License Exonuclease I in Mismatch Repair. *Mol*.  
609 *Cell*. 15:164–166. doi: 10.1016/j.molcel.2004.07.004.
- 610 Temnykh S et al. 2001. Computational and Experimental Analysis of Microsatellites in Rice  
611 (*Oryza sativa* L.): Frequency, Length Variation, Transposon Associations, and Genetic Marker  
612 Potential. *Genome Res*. 11:1441–1452. doi: [10.1101/gr.184001](https://doi.org/10.1101/gr.184001).
- 613 The Gene Ontology Consortium. 2019. The Gene Ontology Resource: 20 years and still GOing  
614 strong. *Nucleic Acids Res*. 47:D330–D338. doi: 10.1093/nar/gky1055.
- 615 Umar A et al. 1996. Requirement for PCNA in DNA Mismatch Repair at a Step Preceding DNA  
616 Resynthesis. *Cell*. 87:65–73. doi: 10.1016/S0092-8674(00)81323-9.

617 Vielba-Fernández A et al. 2020. Fungicide Resistance in Powdery Mildew Fungi. *Microorg.* . 8.  
618 doi: 10.3390/microorganisms8091431.

619 Waterhouse RM et al. 2018. BUSCO Applications from Quality Assessments to Gene Prediction  
620 and Phylogenomics. *Mol. Biol. Evol.* 35:543–548. doi: 10.1093/molbev/msx319.

621 Wickerham H. 2016. ggplot2: Elegant Graphics for Data Analysis. <https://ggplot2.tidyverse.org>.

622 Yang Z. 2007. PAML 4: Phylogenetic Analysis by Maximum Likelihood. *Mol. Biol. Evol.*  
623 24:1586–1591. doi: 10.1093/molbev/msm088.

624 Yoon B-J. 2009. Hidden Markov Models and their Applications in Biological Sequence  
625 Analysis. *Curr. Genomics.* 10:402–415. doi: 10.2174/138920209789177575.

626 Zhu YO, Siegal ML, Hall DW, Petrov DA. 2014. Precise estimates of mutation rate and  
627 spectrum in yeast. *Proc. Natl. Acad. Sci. U. S. A.* 111:E2310–E2318. doi:  
628 10.1073/pnas.1323011111.

629
